# Supplementary material for: Surfactant decorated hydrotalcite-supported polyoxometalates for aerobic oxidation of 5-hydroxymethylfurfural and monosaccharides
Source: Royal Society of Chemistry journal article supplement (doi:10.1039/c9se01296f), 2020-01-01
Supplement: c9se01296f1.pdf [file c9se01296f1.pdf]

## Supporting information

### Surfactant decorated hydrotalcite-supported polyoxometalates for aerobic oxidation of 5-hydroxymethylfurfural and monosaccharides

Ping Cao, Ying Li, Yiming Li, Xueyan Zhang, Xiaohong Wang\*<sup>a</sup> and Zijiang Jiang\*<sup>b</sup>

<sup>a</sup> Key Lab of Polyoxometalate Science of Ministry of Education, Faculty of Chemistry, Northeast Normal University, Changchun 130024, PR China. Fax: 0086-431-85099759; Tel.: 0086-431-

88930042; E-mail address: wangxh665@nenu.edu.cn.

<sup>b</sup> Changchun Institute of Applied Chemistry, Chinese Academy of Sciences, National Analytical Research Center of Electrochemistry and Spectroscopy, Changchun 130024, PR China. E-mail address: zjjiang@ciac.ac.cn.

**S1.** Materials

**S2.** Physical measurements

**S3.** Aerobic oxidation of 5-HMF

**S4.** Aerobic oxidation of fructose or glucose

**S5.** Determination of the acidic and basic properties

**Fig. S1** IR spectra of Mg<sub>4</sub>Al-LDH (a), Mg<sub>4</sub>Al-COOH (b), Mg<sub>4</sub>Al-NH<sub>2</sub> (c), HPMoV@Mg<sub>1</sub>Al-Surf (23) (d), HPMoV@Mg<sub>2</sub>Al-Surf (23) (e), HPMoV@Mg<sub>3</sub>Al-Surf (23) (f), HPMoV@Mg<sub>4</sub>Al-Surf (23) (g), and HPMoV (h)

**Fig. S2** IR spectra of HPMoV@Mg<sub>4</sub>Al-Surf with different loading amount: Mg<sub>4</sub>Al-LDH (a), HPMoV@Mg<sub>4</sub>Al-Surf (5) (b), HPMoV@Mg<sub>4</sub>Al-Surf (12) (c), HPMoV@Mg<sub>4</sub>Al-Surf (17) (d), HPMoV@Mg<sub>4</sub>Al-Surf (23) (e), HPMoV@Mg<sub>4</sub>Al-Surf (28) (f), and HPMoV (g)

**Fig. S3** DR-UV-vis spectra of the HPMoV@Mg<sub>4</sub>Al-Surf (5-28)

**Fig. S4** Water contact angle of Mg<sub>4</sub>Al-LDH (a), Mg<sub>4</sub>Al-NH<sub>2</sub> (b), Mg<sub>4</sub>Al-Surf (c) and HPMoV@Mg<sub>4</sub>Al-Surf (23) (d)

**Fig. S5** XRD patterns of Mg<sub>4</sub>Al-LDH, Mg<sub>4</sub>Al-COOH, Mg<sub>4</sub>Al-NH<sub>2</sub>, HPMoV@Mg<sub>n</sub>Al-Surf (23) (n = 1, 2, 3, 4) and HPMoV

**Fig. S6** XRD patterns of Mg<sub>4</sub>Al-LDH, HPMoV@Mg<sub>4</sub>Al-Surf (5-28) and HPMoV

**Fig. S7** Nitrogen adsorption-desorption isotherms (a) and pore size distribution profiles according to BJH desorption dV/dD pore volume (b) of Mg<sub>4</sub>Al-LDH and HPMoV@Mg<sub>4</sub>Al-Surf (5-28)

**Fig. S8** The Energy-dispersive spectroscopy (EDX) mapping of HPMoV@Mg<sub>4</sub>Al-Surf (23)

**Fig. S9** The EDAX of Mg<sub>4</sub>Al-LDH (a) and HPMoV@Mg<sub>4</sub>Al-Surf (5-28) (b-f)

**Fig. S10** IR spectra of pyridine adsorption of HPMoV@Mg<sub>n</sub>Al-Surf (23) (n = 1-3) (a-c) and HPMoV@Mg<sub>4</sub>Al-Surf (5-28) (d-h)

**Fig. S11** IR spectra of HPMoV@Mg<sub>4</sub>Al-Surf (5-28) (a-e) and HPMoV@Mg<sub>4</sub>Al-Surf (5-28) (a1-e1) after absorption of 5-HMF

**Fig. S12** The carbon balance for HPMoV, HPMoV@Mg<sub>4</sub>Al-LDH (23) and HPMoV@Mg<sub>4</sub>Al-Surf (5-28) for oxidation of 5-HMF. Reaction conditions: 100 mg of 5-HMF, 30 mg of catalyst, 4 mL of DMSO, 140 °C, 1.0 MPa of O<sub>2</sub>, 12 h

**Fig. S13** The generation of CO<sub>2</sub> was determined by GC-MS

**Fig. S14** The content of DFF varied with time upon HPMoV, HPMoV@Mg<sub>4</sub>Al-LDH (5-28) and HPMoV@Mg<sub>4</sub>Al-Surf (5-28) at 140 °C with 1.0 MPa of O<sub>2</sub>

**Fig. S15** Oxidation of 5-HMF in different solvents under the reaction conditions of 100 mg of 5-HMF, 30 mg of catalyst, and 4 mL of solvent at 140 °C for 12 h with 1.0 MPa of O<sub>2</sub>

**Fig. S16** Oxidation of 5-HMF under different oxygen pressure. Reaction conditions: 100 mg of 5-HMF, 30 mg of catalyst, and 4 mL of DMSO at 140 °C for 12 h

**Fig. S17** Optimization of reaction conditions on 5-HMF conversion at atmospheric O<sub>2</sub> (0.1 MPa) as (a) reaction temperature, (b) reaction time, (c) usage of catalyst on the oxidation of 5-HMF. Reaction conditions: 100 mg of 5-HMF, 4 mL of DMSO

**Fig. S18** UV-Vis spectrum of the reaction mixture after separating HPMoV@Mg<sub>4</sub>Al-Surf (23)

**Fig. S19** The structure characterization of reused HPMoV@Mg<sub>4</sub>Al-Surf (23). (a) DR-UV-vis, (b) IR, (c) <sup>31</sup>P MAS NMR, (d) XPS, (e) SEM, and (f) HRTEM

**Table S1** Oxidation of 5-HMF under various reaction conditions by different catalysts

**Table S2** Elementary analysis, BET surface area, acid content and base content for HPMoV, Mg<sub>n</sub>Al-LDH and HPMoV@Mg<sub>n</sub>Al-Surf (n = 1-4)

**Scheme S1** Reaction pathways for production of 5-HMF then to DFF from glucose in presence of multi-functional catalysts

## **S1. Materials**

All chemicals and solvents were purchased from commercial supplies without further purification. In this paper,  $\text{H}_5\text{PMo}_{10}\text{V}_2\text{O}_{40}$  (HPMoV) were prepared according to the well-established method<sup>[1]</sup> and characterized by IR spectroscopy.  $\text{Mg}_n\text{Al-LDH}$  ( $n$  represents Mg: Al =  $n$ : 1) with different proportions of magnesium and aluminum were synthesized according to Ref. [2].

## **S2. Physical measurements**

The elemental analysis was determined by a Leeman Plasma Spec (I) ICP-ES. IR spectra ( $4000\text{--}400\text{ cm}^{-1}$ ) were recorded on a Nicolet Magna 560 IR spectrometer (KBr disks). UV-vis spectra ( $200\text{--}800\text{ nm}$ ) were performed on a Cary 500 UV-vis-NIR spectrophotometer. DR-UV-vis spectra ( $200\text{--}800\text{ nm}$ ) were collected on a UV-2600 UV-vis spectrophotometer (Shimadzu). The structure of samples was characterized using a Japan Rigaku Dmax 2000 X-ray diffractometer with Cu  $\text{K}\alpha$  radiation ( $\lambda = 0.154178\text{ nm}$ ). The  $^{31}\text{P}$  MAS NMR were acquired by using a Bruker AM500 spectrometer at 202.5 MHz. XPS spectra were recorded on an Escalab-MK II photoelectronic spectrometer equipped with a micro-focus monochromatic Al  $\text{K}\alpha$  X-ray source. SEM micrographs and EDX spectra were obtained using a XL30 ESEM FEG at 25 kV (PhilipsXL-30). EDX was carried out to prove the existence of the Mg, Al, O, P, Mo and V elements. TEM micrographs were measured on a JEM-2100F instrument. Nitrogen adsorption-desorption isotherms and Brunauer-Emmet-Teller (BET) surface area were measured using an ASAP 2010M surface analyzer (the samples were degassed at  $100\text{ }^\circ\text{C}$  overnight). The acidic and basic properties were detected by a ZDJ-4B automatic potentiometric titrator. The product analysis was detected by using a high-performance liquid chromatography (HPLC) that equipped with a reversed-phase C18 column and a UV detector at the wavelength of 278 nm. Acetonitrile and ultrapure water (V/V = 2: 1) were used as mobile phase with a flow rate of 0.8 mL/min. The total organic carbon (TOC) was measured by a TOC Analyzer (TOC-LCPH, Shimadzu, Japan).

## **S3. Aerobic oxidation of 5-HMF**

Aerobic oxidation of 5-HMF was carried out in Teflon-lined autoclave equipped with a magnetic stirrer. Typically, 100 mg of 5-HMF and 30 mg of catalyst were added into 4 mL of DMSO, then the mixture was heated up to  $140\text{ }^\circ\text{C}$ . During the reaction, the reactor was maintained at 1.0 MPa of oxygen pressure. After the reaction, the reactor was cooled to room temperature. The catalyst was separated from the mixture by centrifuge, then washed with ethanol several times and dried

in oven at 60 °C for 12 h for reuse. Meanwhile, the reused experiment was carried out as the catalyst was separated by centrifuge and reused without any treatment.

$$\text{5-HMF conversion} = \text{moles of converted 5-HMF} / \text{moles of initial 5-HMF} \times 100 \%$$

$$\text{DFF yield} = \text{moles of DFF} / \text{moles of initial 5-HMF} \times 100 \%$$

#### **S4. Aerobic oxidation of fructose or glucose**

Aerobic oxidation of fructose or glucose was carried out in Teflon-lined autoclave equipped with a magnetic stirrer. In the experiment, fructose or glucose (100 mg) and catalyst (30 mg) were added to 4 mL of DMSO, and the mixture was heated up to 140 °C under 0.8 MPa of O<sub>2</sub>. After the reaction, the reactor was cooled to room temperature, then the reused experiment was carried out in accordance with the above method in S3.

#### **S5. Determination of the acidic and basic properties**

The total acid content of catalysts was determined by automatic potentiometric titration. 50 mg catalyst was suspended in 50 mL of acetonitrile with stirring vigorously for 3 h. Then the resulting mixture was titrated with the solution of n-butylamine in acetonitrile (0.01 M). The titration endpoint could be detected from the potentiometric titration curve and the total acid content of the catalysts could be calculated. IR spectra of pyridine adsorption was used for recognizing the Lewis and Brønsted acid sites. Pyridine was adsorbed by catalysts for 12 h under the condition of vacuum and 60 °C. The capacity of acidity was calculated by Lambert-Beer formula:  $A = (\epsilon \times W \times c) / S$ . (A: absorbance, cm<sup>-1</sup>,  $\epsilon$ : extinction coefficient, m<sup>2</sup>·mol<sup>-1</sup>, W: the sample weight, kg, c: the concentration of acid, mmol·g<sup>-1</sup>, S: the sample disk area, m<sup>2</sup>). The amount of Lewis and Brønsted acid sites was estimated from the integrated area of the adsorption bands at 1450 and 1540 cm<sup>-1</sup>, respectively. The base content of the catalysts was measured by using the conductivity titration method. 50 mg catalyst was suspended in 50 mL of diluted 0.001 M HCl with stirring vigorously for 3 h. Then the resulting mixture was titrated with the solution of 0.01 M NaOH. The titration endpoint could be detected by a sudden increase in conductivity.

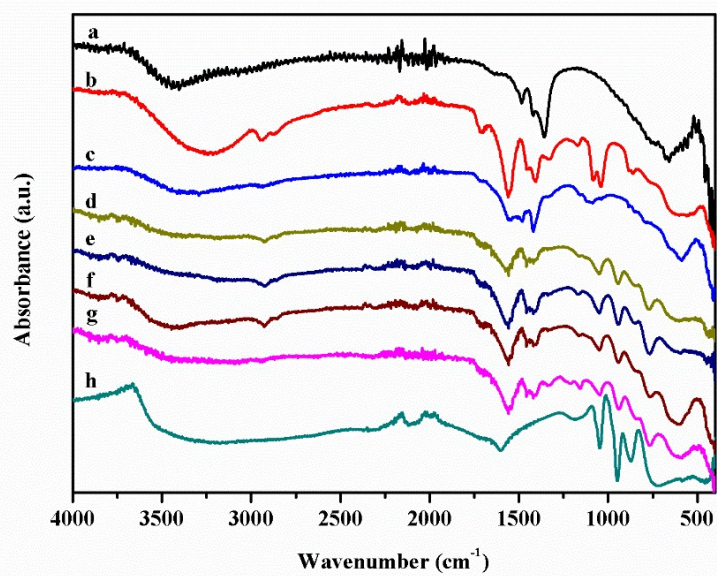

**Fig. S1** IR spectra of Mg<sub>4</sub>Al-LDH (a), Mg<sub>4</sub>Al-COOH (b), Mg<sub>4</sub>Al-NH<sub>2</sub> (c), HPMoV@Mg<sub>1</sub>Al-Surf (23) (d), HPMoV@Mg<sub>2</sub>Al-Surf (23) (e), HPMoV@Mg<sub>3</sub>Al-Surf (23) (f), HPMoV@Mg<sub>4</sub>Al-Surf (23) (g), and HPMoV (h)

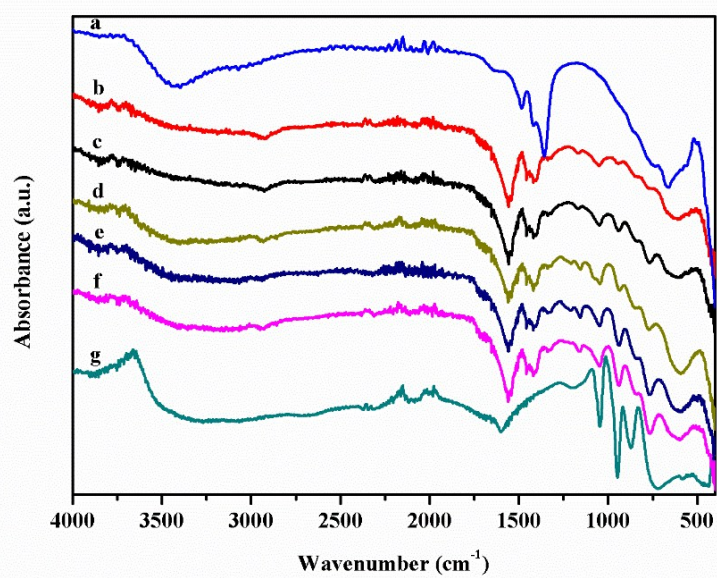

**Fig. S2** IR spectra of HPMoV@Mg<sub>4</sub>Al-Surf with different loading amount: Mg<sub>4</sub>Al-LDH (a), HPMoV@Mg<sub>4</sub>Al-Surf (5) (b), HPMoV@Mg<sub>4</sub>Al-Surf (12) (c), HPMoV@Mg<sub>4</sub>Al-Surf (17) (d), HPMoV@Mg<sub>4</sub>Al-Surf (23) (e), HPMoV@Mg<sub>4</sub>Al-Surf (28) (f), and HPMoV (g)

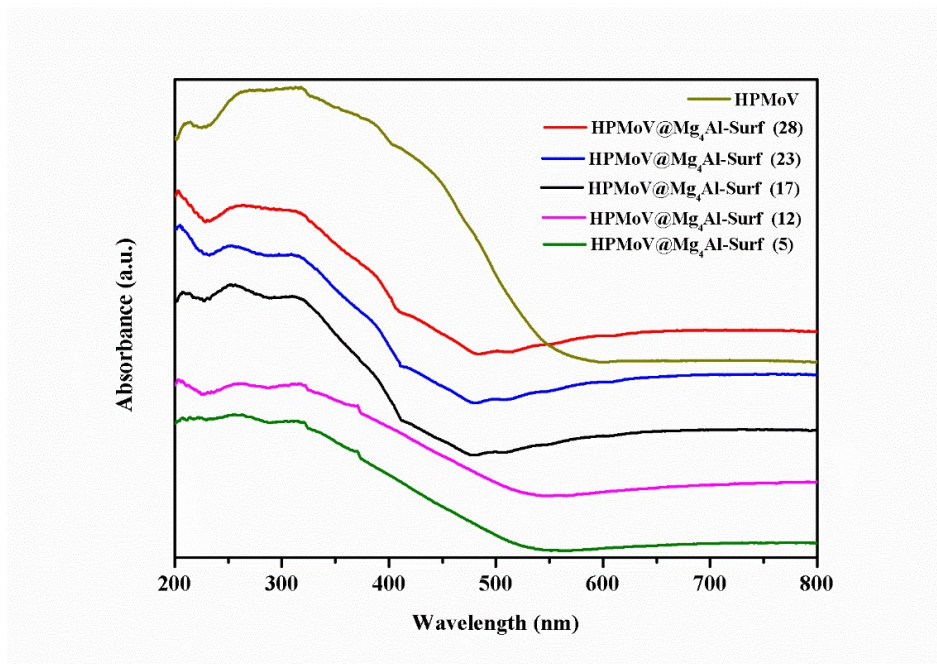

Fig. S3 DR-UV-vis spectra of the HPMoV@Mg<sub>4</sub>Al-Surf (5-28)

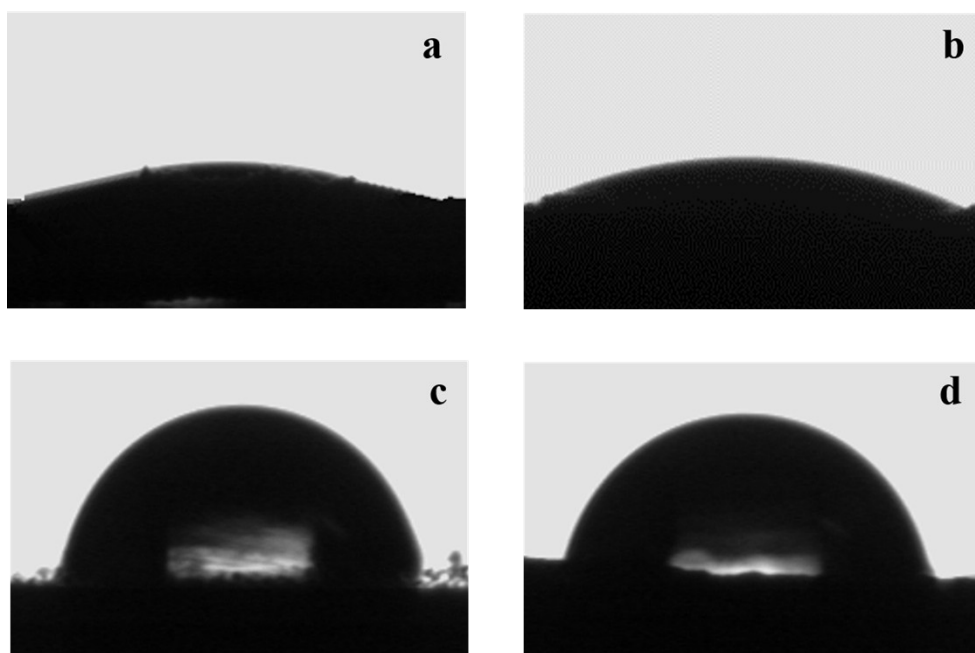

**Fig. S4** Water contact angle of  $Mg_4Al$ -LDH (a),  $Mg_4Al-NH_2$  (b),  $Mg_4Al$ -Surf (c) and  $HPMoV@Mg_4Al$ -Surf (23) (d)



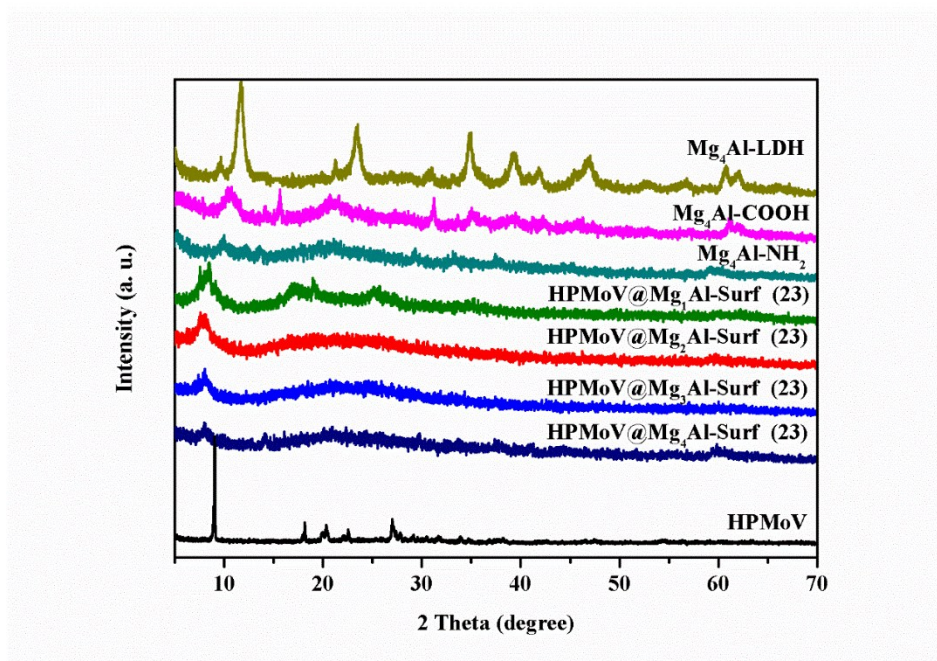

**Fig. S5** XRD patterns of Mg<sub>4</sub>Al-LDH, Mg<sub>4</sub>Al-COOH, Mg<sub>4</sub>Al-NH<sub>2</sub>, HPMoV@Mg<sub>n</sub>Al-Surf (23) (n = 1, 2, 3, 4) and HPMoV

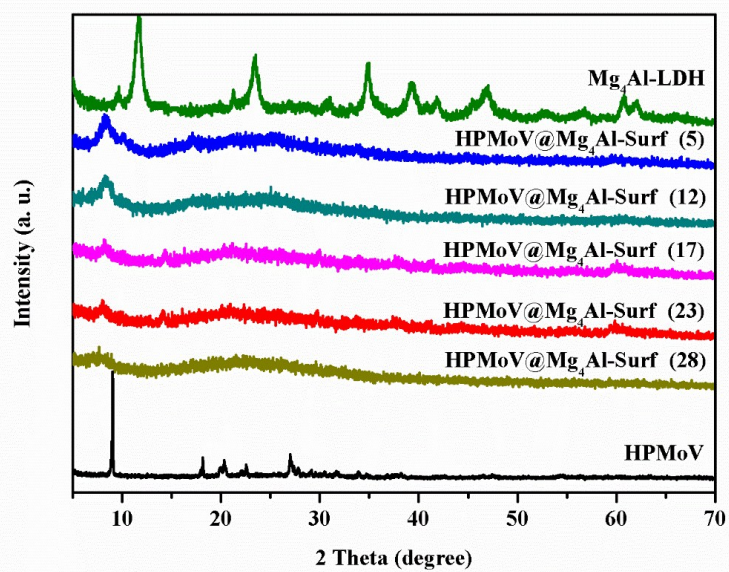

**Fig. S6** XRD patterns of Mg<sub>4</sub>Al-LDH, HPMoV@Mg<sub>4</sub>Al-Surf (5-28) and HPMoV

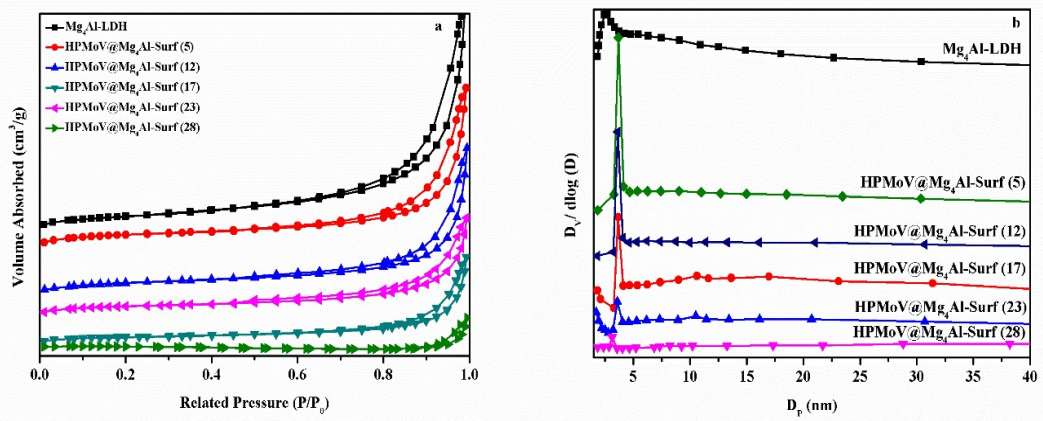

**Fig. S7** Nitrogen adsorption-desorption isotherms (a) and pore size distribution profiles according to BJH desorption  $dV/dD$  pore volume (b) of Mg<sub>4</sub>Al-LDH and HPMoV@Mg<sub>4</sub>Al-Surf (5-28)

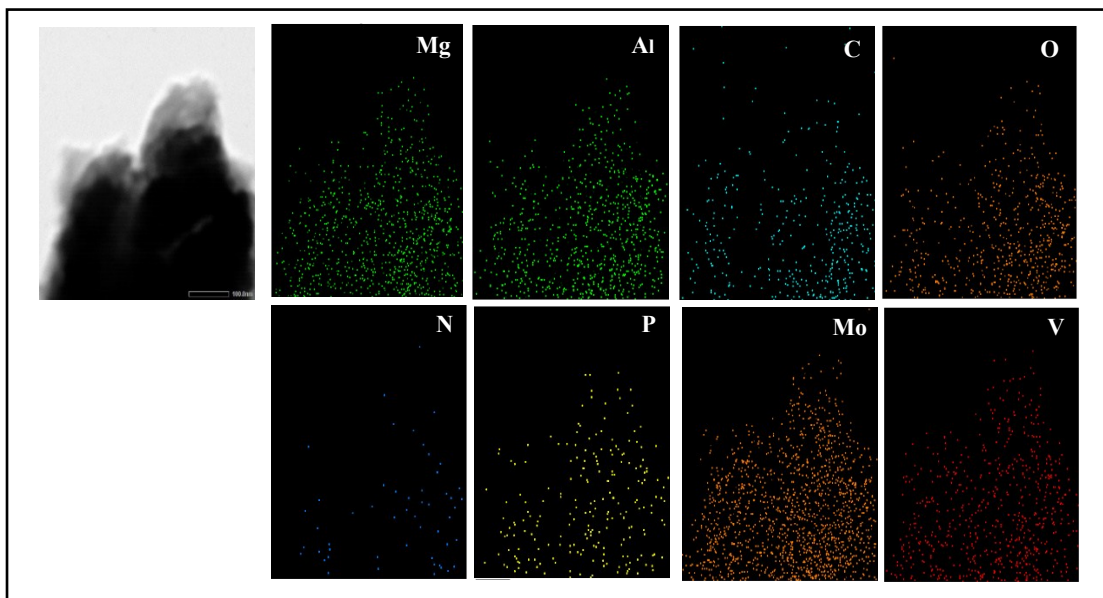

**Fig. S8** The Energy-dispersive spectroscopy (EDX) mapping of HPMoV@Mg<sub>4</sub>Al-Surf (23)

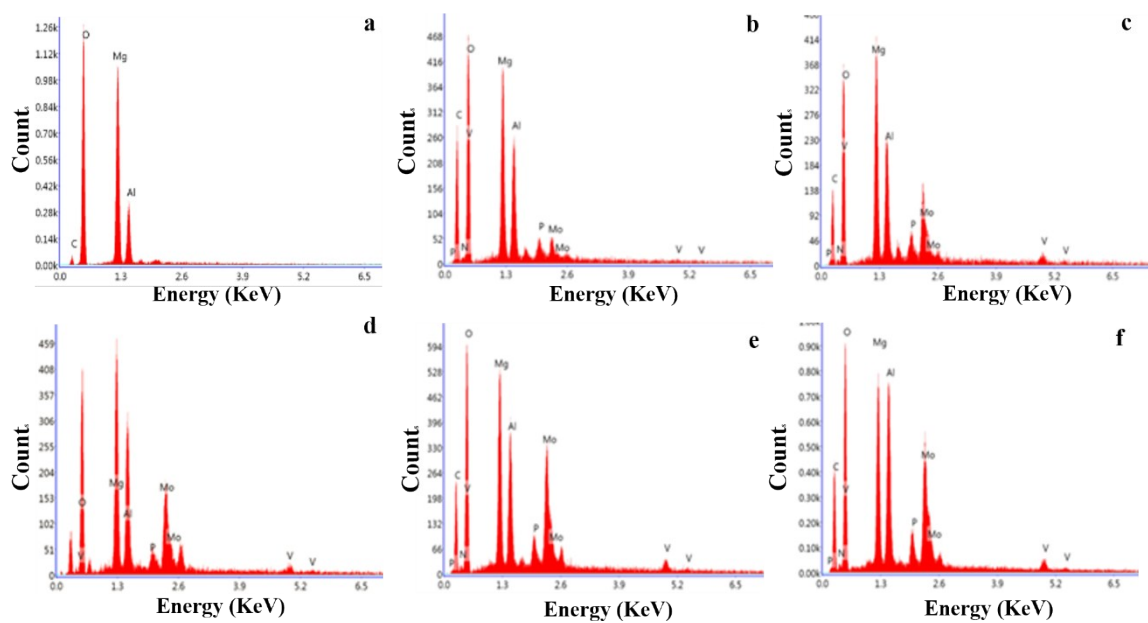

**Fig. S9** The EDAX of Mg<sub>4</sub>Al-LDH (a) and HPMoV@Mg<sub>4</sub>Al-Surf (5-28) (b-f)

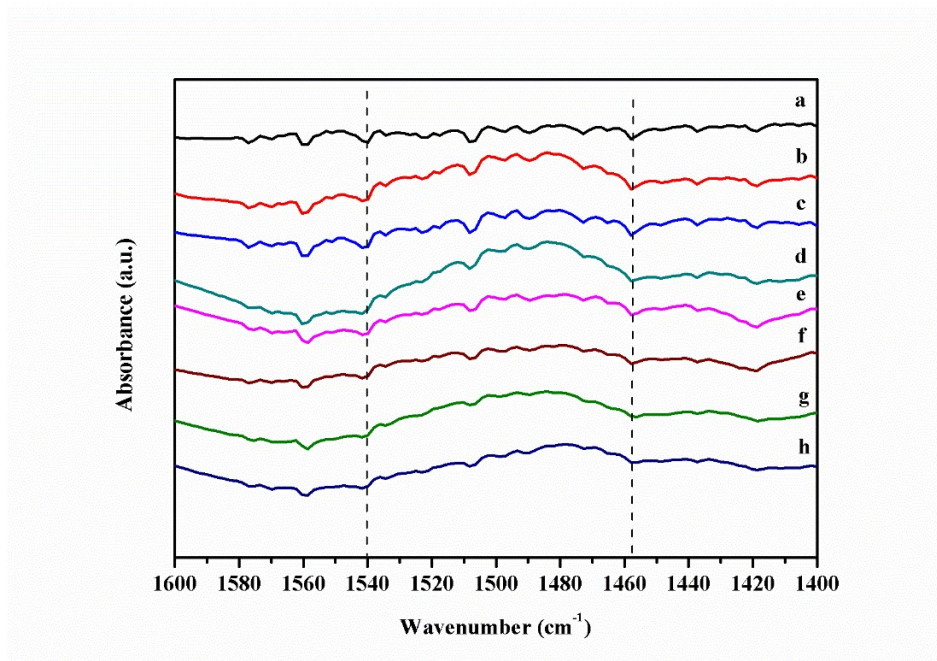

**Fig. S10** IR spectra of pyridine adsorption of HPMoV@Mg<sub>n</sub>Al-Surf (23) (n = 1-3) (a-c) and HPMoV@Mg<sub>4</sub>Al-Surf (5-28) (d-h)



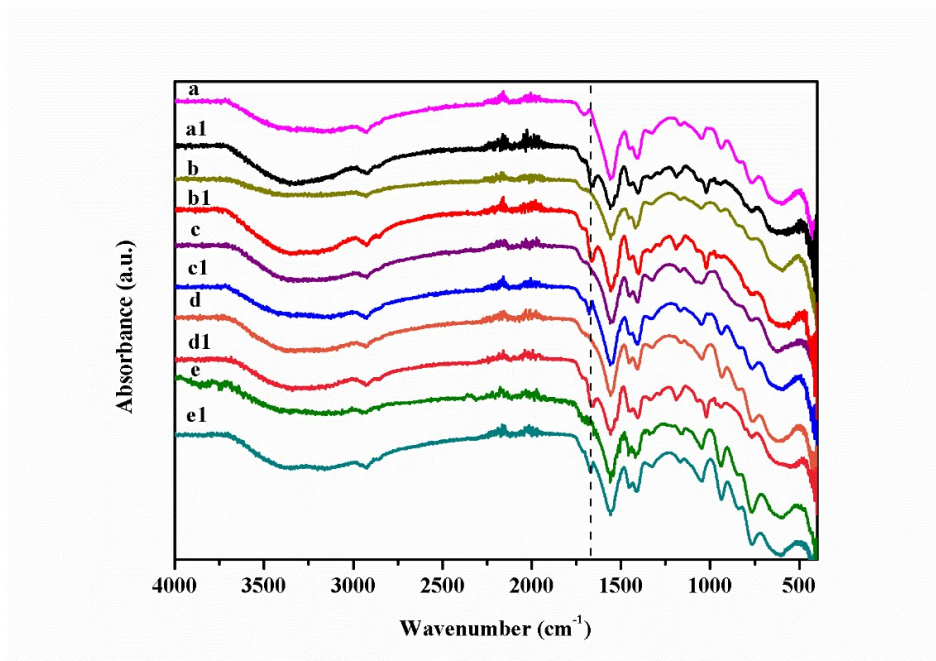

**Fig. S11** IR spectra of HPMoV@Mg<sub>4</sub>Al-Surf (5-28) (a-e) and HPMoV@Mg<sub>4</sub>Al-Surf (5-28) (a1-e1) after absorption of 5-HMF

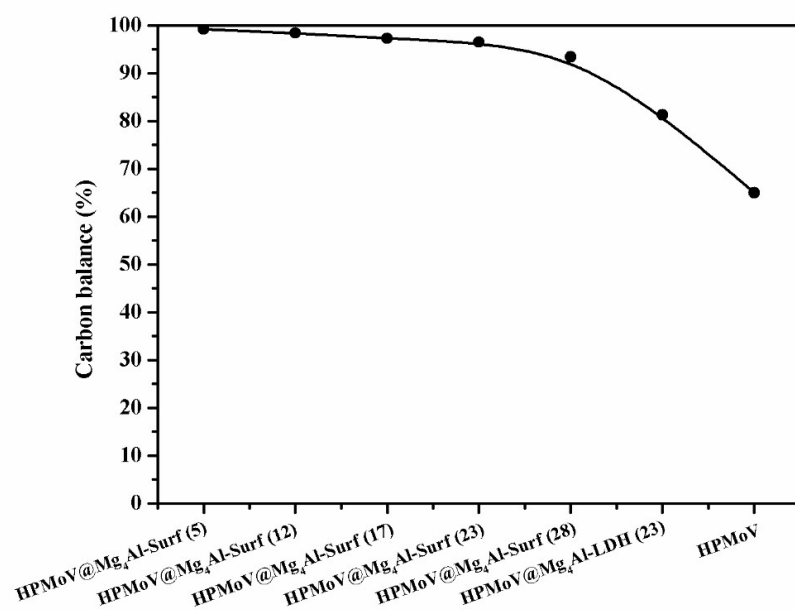

**Fig. S12** The carbon balance for HPMoV, HPMoV@Mg<sub>4</sub>Al-LDH (23) and HPMoV@Mg<sub>4</sub>Al-Surf (5-28) for oxidation of 5-HMF. Reaction conditions: 100 mg of 5-HMF, 30 mg of catalyst, 4 mL of DMSO, 140 °C, 1.0 MPa of O<sub>2</sub>, 12 h



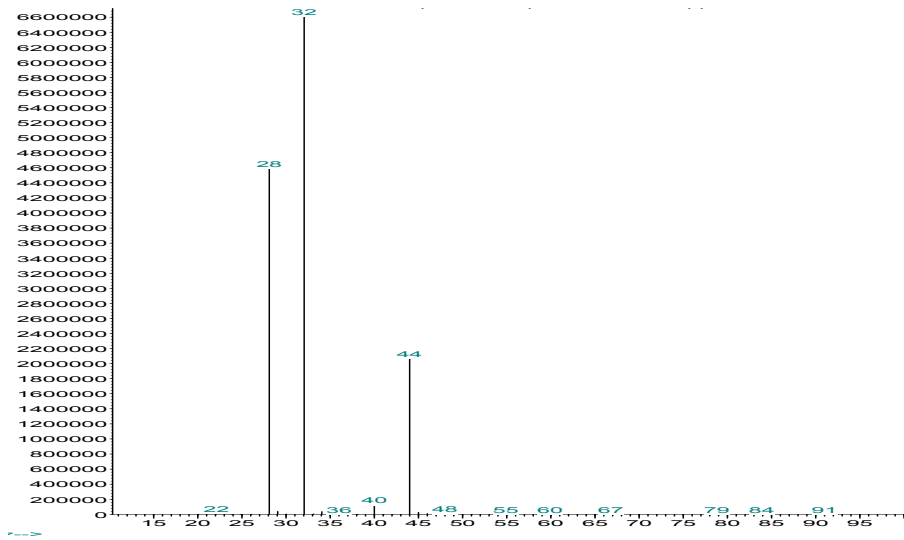

**Fig. S13** The generation of CO<sub>2</sub> was determined by GC-MS

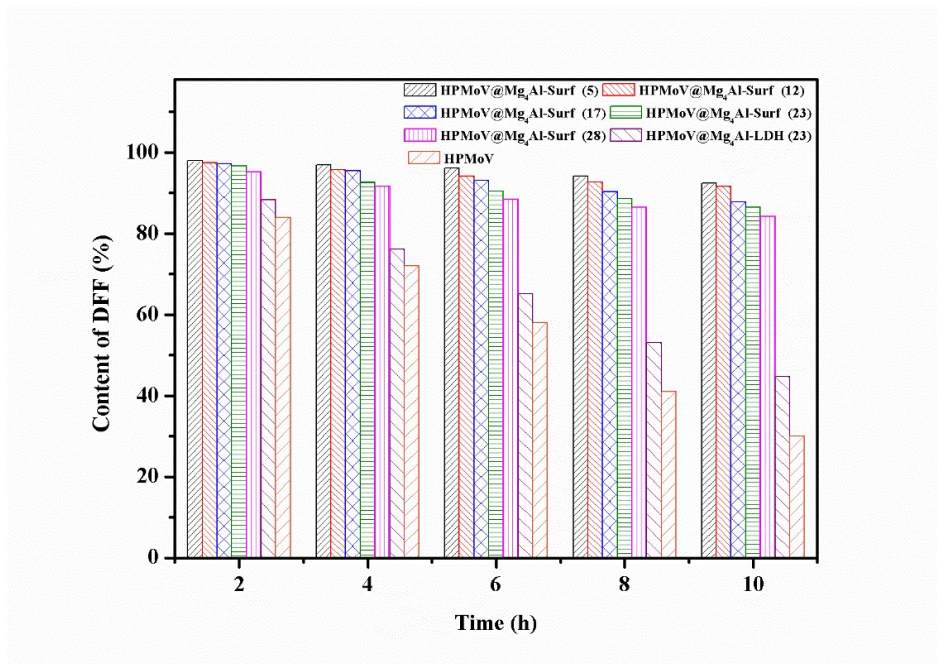

**Fig. S14** The content of DFF varied with time upon HPMoV, HPMoV@Mg<sub>4</sub>Al-LDH (5-28) and HPMoV@Mg<sub>4</sub>Al-Surf (5-28) at 140 °C with 1.0 MPa of O<sub>2</sub>

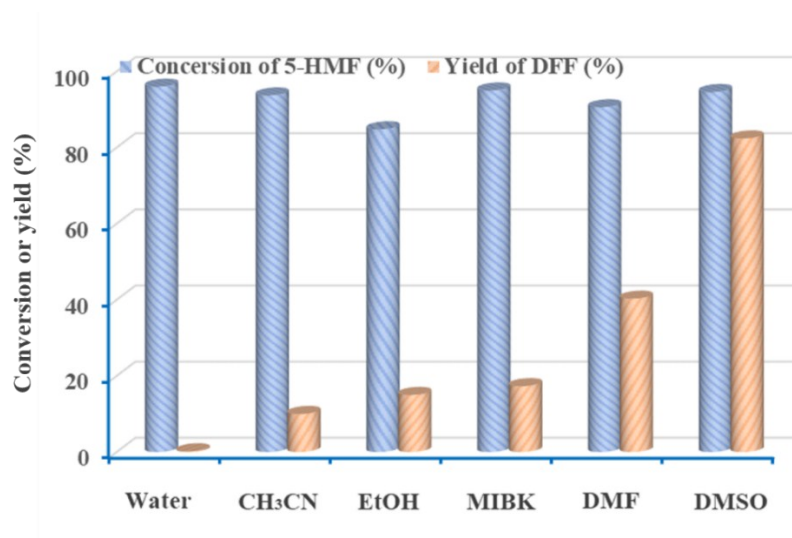

**Fig. S15** Oxidation of 5-HMF in different solvents under the reaction conditions of 100 mg of 5-HMF, 30 mg of catalyst, and 4 mL of solvent at 140 °C for 12 h with 1.0 MPa of O<sub>2</sub>

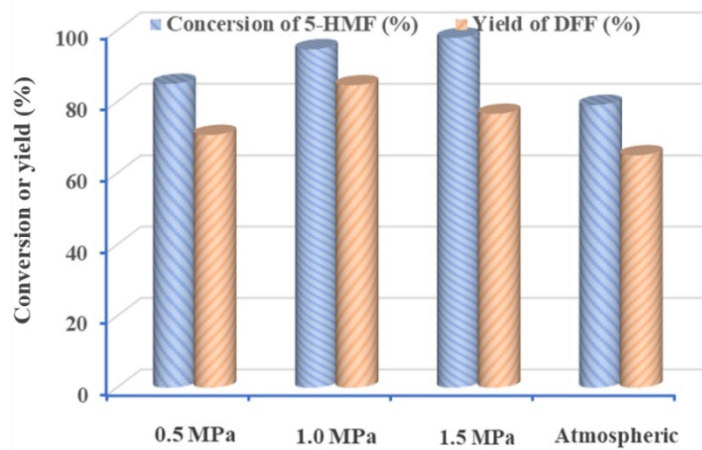

**Fig. S16** Oxidation of 5-HMF under different oxygen pressure. Reaction conditions: 100 mg of 5-HMF, 30 mg of catalyst, and 4 mL of DMSO at 140 °C for 12 h

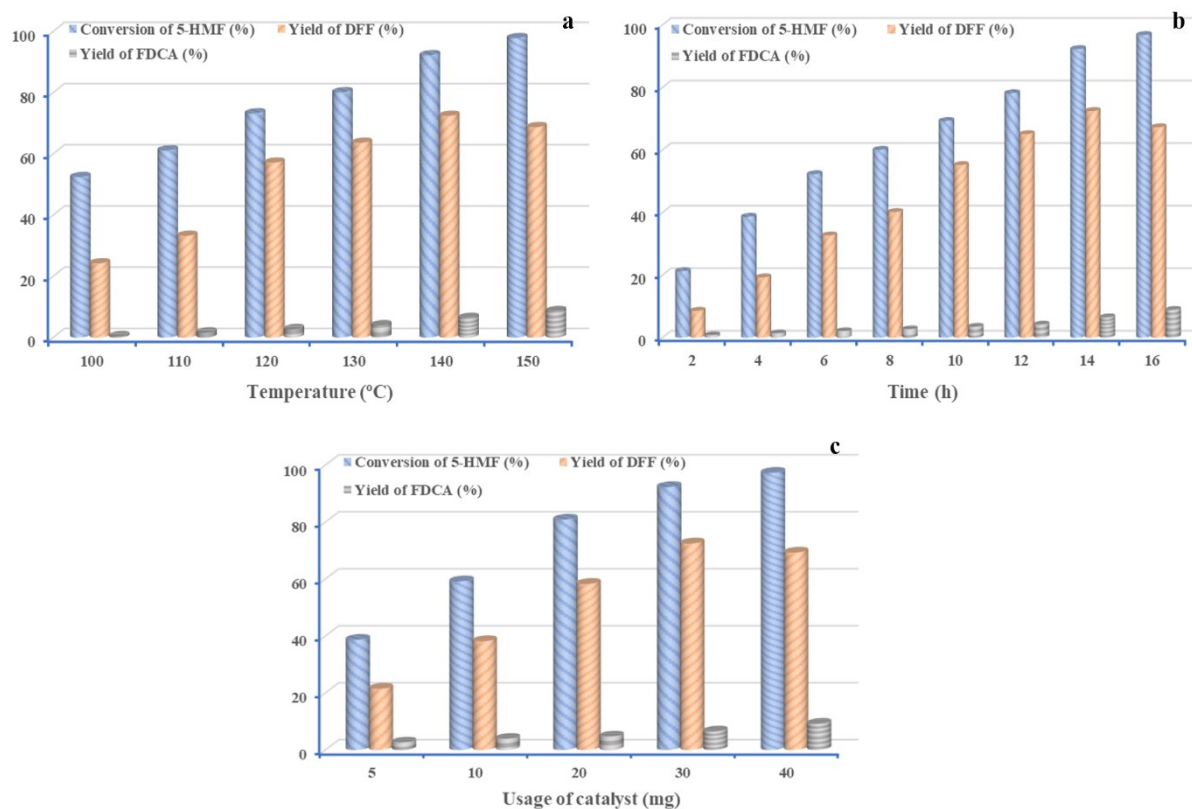

**Fig. S17** Optimization of reaction conditions on 5-HMF conversion at atmospheric O<sub>2</sub> (0.1 MPa) as (a) reaction temperature, (b) reaction time, (c) usage of catalyst on the oxidation of 5-HMF.

Reaction conditions: 100 mg of 5-HMF, 4 mL of DMSO

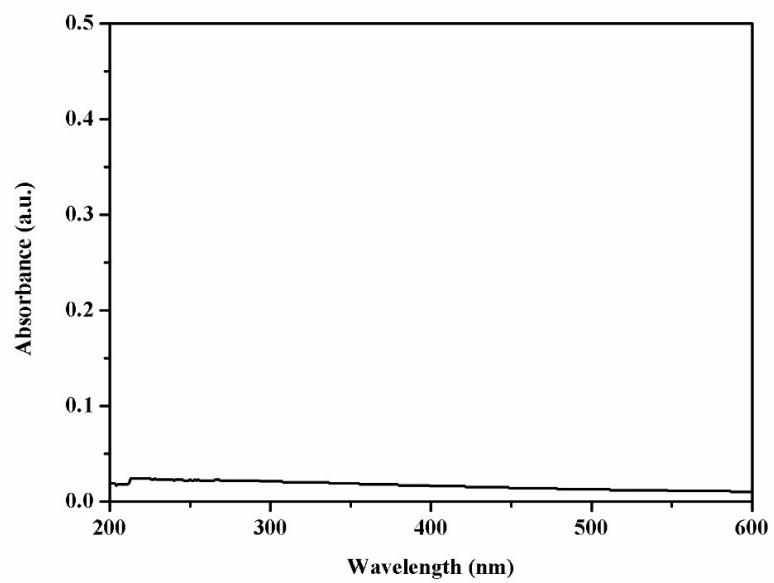

**Fig. S18** UV-Vis spectrum of the reaction mixture after separating HPMoV@Mg<sub>4</sub>Al-Surf (23)

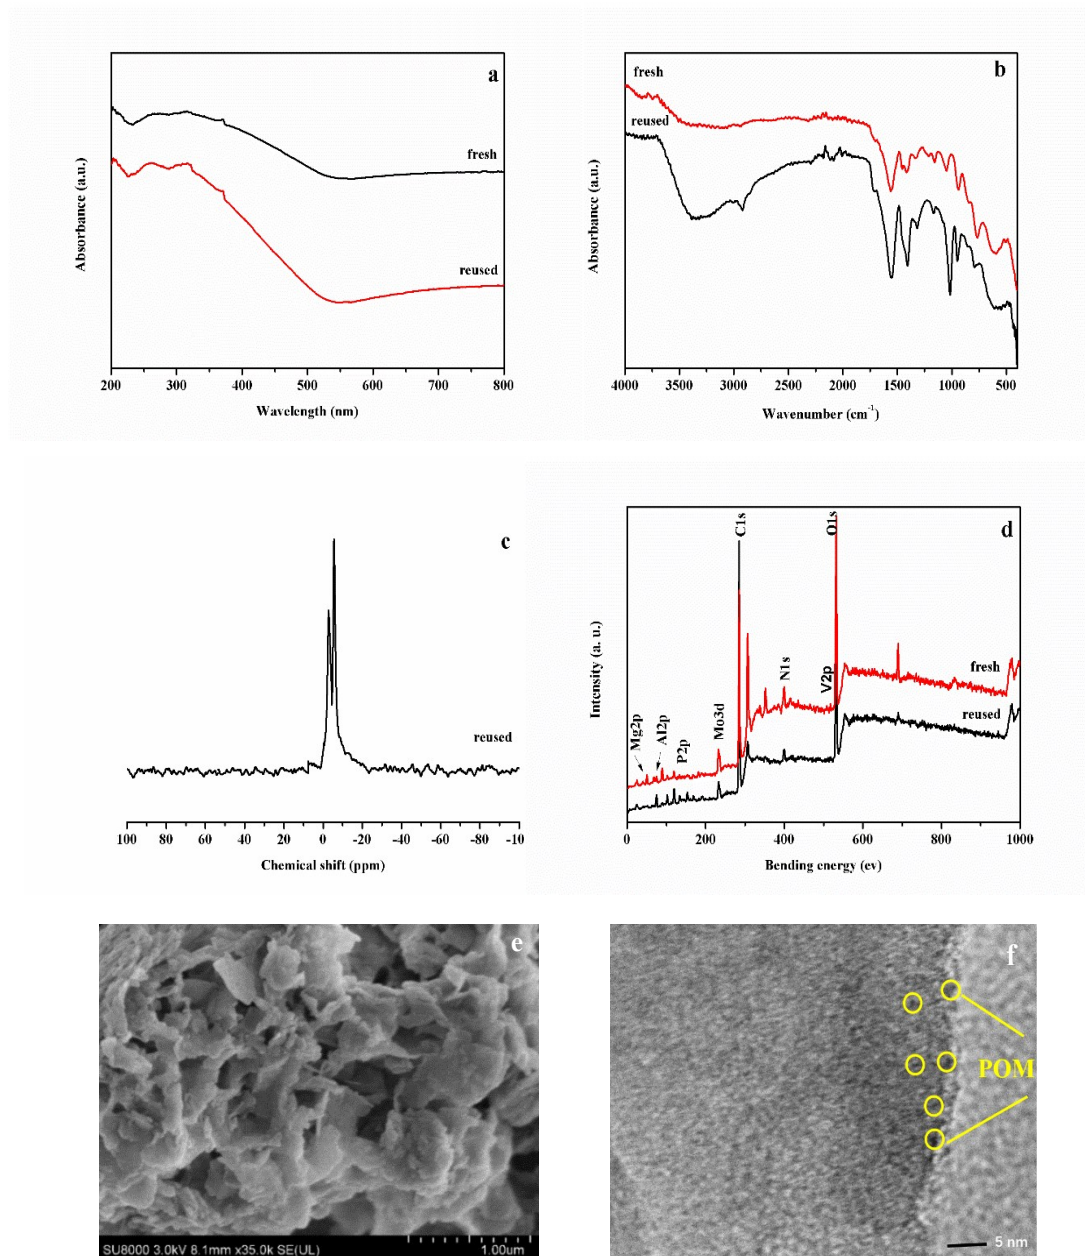

**Fig. S19** The structure characterization of reused HPMoV@Mg<sub>4</sub>Al-Surf (23). (a) DR-UV-vis, (b) IR, (c) <sup>31</sup>P MAS NMR, (d) XPS, (e) SEM, and (f) HRTEM

**Table S1** Oxidation of 5-HMF under various reaction conditions by different catalysts

| Catalysts                                      | Reaction Condition                         | Oxidant                      | T (°C) | Time (h) | Con.% | Yield of DFF % | Yield of FDCA% | Yield of FFCA% | Ref. |
|------------------------------------------------|--------------------------------------------|------------------------------|--------|----------|-------|----------------|----------------|----------------|------|
| Mn <sub>6</sub> Fe <sub>1</sub> O <sub>x</sub> | 1 mmol HMF,<br>5 mL DMF                    | O <sub>2</sub><br>1.5 MPa    | 110    | 5        | 97    | 91             | -              | -              | 3    |
| Co-Mn/N@C                                      | 0.5 mmol HMF,<br>10 mL H <sub>2</sub> O    | O <sub>2</sub><br>1 bar      | 85     | 12       | 99.7  | -              | 96.1           | -              | 4    |
| Cs/MnO <sub>x</sub>                            | 63 mg HMF,<br>10 mL DMF                    | O <sub>2</sub><br>10 bar     | 100    | 12       | 98.4  | 94.7           | -              | -              | 5    |
| Au/HAP                                         | 0.2513 g HMF,<br>20 mL CH <sub>3</sub> OH  | Air<br>2.4 MPa               | 130    | 6        | 99.1  | -              | 89.3           | -              | 6    |
| Pt/Fe <sub>3</sub> O <sub>4</sub> /rGO         | 0.50 mmol HMF,<br>20 mL H <sub>2</sub> O   | O <sub>2</sub><br>0.5 MPa    | 95     | 0.5      | 100   | -              | 98             | -              | 7    |
| MnO <sub>x</sub> /P25 (TiO <sub>2</sub> )      | 1mmol 5-HMF,<br>10 g ethanol               | Air<br>30 bar                | 140    | 2        | 33    | 32             | -              | -              | 8    |
| Pd-Au/HT (1 : 4)                               | 200 mg HMF,<br>50 ml H <sub>2</sub> O      | O <sub>2</sub><br>60 mL/min. | 60     | 6        | 99.9  | -              | 90             | -              | 9    |
| Pt/PVP                                         | 0.5 mmol HMF,<br>10 mL H <sub>2</sub> O    | O <sub>2</sub><br>1.0 MPa    | 110    | 5        | 99.9  | -              | 99.9           | -              | 10   |
| Au/CeO <sub>2</sub>                            | 0.5 mmol HMF,<br>20 ml H <sub>2</sub> O    | O <sub>2</sub><br>0.5 MPa    | 130    | 2.5      | 99.9  | -              | 90             | -              | 11   |
| Pd/CC                                          | 0.1 g HMF,<br>5 mL H <sub>2</sub> O        | O <sub>2</sub><br>20 mL/min  | 140    | 30       | 93    | -              | 85             | -              | 12   |
| MgO-CeO <sub>2</sub>                           | 0.14 M 5-HMF,<br>7 mL H <sub>2</sub> O     | O <sub>2</sub><br>0.9 bar    | 100    | 9        | 97.8  | 96             | -              | -              | 13   |
| Ru/AC                                          | 0.3 mmol HMF,<br>14.5 mL H <sub>2</sub> O, | O <sub>2</sub><br>1 bar      | 75,    | 1        | 100   | -              | -              | 92             | 14   |
| Au-Ru/rGO                                      | 0.5 mmol of<br>HMF,<br>10 ml toluene,      | O <sub>2</sub><br>5 bar      | 80     | 8        | 90.9  | -              | -              | 95.7           | 15   |
| Pt-Ni/AC-15ALD                                 | 0.015 g HMF,<br>3 mL H <sub>2</sub> O      | O <sub>2</sub><br>0.8 MPa    | 100    | 15       | 100   | -              | 97.5           | -              | 16   |
| NiFe-LDH                                       | 10 mmol HMF,<br>1M KOH                     | -                            | 25     | 1.5      | 98    | -              | 98             | -              | 17   |
| NC-T                                           | 0.5 mmol HMF,<br>10 mL acetonitrile        | O <sub>2</sub><br>10 bar     | 100    | 4        | 100   | 95.1           | -              | -              | 18   |
| Ru/ZrO <sub>2</sub>                            | 0.5 mmol HMF,<br>10 mL H <sub>2</sub> O    | O <sub>2</sub><br>10 bar     | 120    | 16       | 100   | -              | 97             | 3              | 19   |
|                                                | 2 mmol HMF                                 | O <sub>2</sub>               |        | 24       |       |                |                |                |      |



|                                                           |                                            |                             |     |     |      |      |      |   |    |
|-----------------------------------------------------------|--------------------------------------------|-----------------------------|-----|-----|------|------|------|---|----|
| MnCo <sub>2</sub> O <sub>4</sub>                          | 15 mL toluene                              | 1.0 MPa                     |     |     |      |      |      |   |    |
| Fe <sub>3</sub> O <sub>4</sub> @SiO <sub>2</sub>          | 0.4 mmol HMF,<br>5 mL H <sub>2</sub> O     | O <sub>2</sub><br>10 bar    | 110 | 48  | 92   | -    | 73.6 | - | 21 |
| MnCo <sub>2</sub> O <sub>4</sub>                          | 0.2 mmol HMF,<br>5 mL H <sub>2</sub> O     | O <sub>2</sub><br>1 MPa     | 100 | 24  | 99.9 | -    | 70.9 | - | 22 |
| MnFe <sub>2</sub> O <sub>4</sub>                          | 1 mmol HMF,<br>20 ml<br>acetonitrile       | -                           | 100 | 5   | 99   | -    | 85   | - | 23 |
| Cu/NG,<br>TEMPO                                           | 126 mg HMF,<br>15 mL<br>acetonitrile       | O <sub>2</sub><br>0.4 MPa   | 70  | 8   | 99.8 | 99.2 | -    | - | 24 |
| MgO·MnO <sub>2</sub> ·C<br>eO <sub>2</sub>                | 0.015 M 5-HMF,<br>7 mL of H <sub>2</sub> O | O <sub>2</sub><br>2.0 MPa   | 110 | 10  | 98.9 | -    | 94   | - | 25 |
| CoPz/g-C <sub>3</sub> N <sub>4</sub>                      | 100.8 mg HMF,<br>40 mL buffer<br>solution  | Air<br>20 mL/min            | 25  | 14  | 99.6 | -    | 96.1 | - | 26 |
| ZnFe <sub>1.65</sub> Ru <sub>0.35</sub><br>O <sub>4</sub> | 0.5 mol HMF, 3<br>mL DMF                   | O <sub>2</sub><br>20 mL/min | 110 | 4   | 94   | 82.2 | 3.4  | - | 27 |
| Ru/MnCo <sub>2</sub> O <sub>4</sub>                       | 2 mmol HMF, 20<br>mL H <sub>2</sub> O      | Air<br>0.7 MPa              | 120 | 10  | 100  | -    | 99.1 | - | 28 |
| Ni <sub>0.9</sub> Pd <sub>0.1</sub>                       | 2 mmol HMF, 10<br>mL H <sub>2</sub> O      | O <sub>2</sub><br>1.0 MPa   | 80  | 4   | >99  | -    | 86   | - | 29 |
| Co/Mn/Br                                                  | 2.2-2.3 mmol<br>HMF, 2.5 mL<br>HOAc        | O <sub>2</sub><br>0.76 MPa  | 180 | 1/6 | >99  | -    | 92.9 | - | 30 |
| α-CuV <sub>2</sub> O <sub>6</sub>                         | 1mol HMF, 4 mL<br>DMSO                     | O <sub>2</sub><br>1 bar     | 130 | 3   | 100  | 99.9 | -    | - | 31 |
| V <sub>2</sub> O <sub>5</sub> /ceramic                    | 63 mg HMF, 4<br>mL DMSO                    | O <sub>2</sub><br>40 mL/min | 140 | 5   | 100  | 87.5 | -    | - | 32 |
| MnO <sub>2</sub>                                          | 0.2 mmol HMF, 5<br>mL H <sub>2</sub> O     | O <sub>2</sub><br>1.0 MPa   | 100 | 24  | ≥99  | -    | 91   | - | 33 |
| CC-SO <sub>3</sub> H-NH <sub>2</sub>                      | 200 mg HMF,<br>2 mL DMSO                   | O <sub>2</sub><br>20 mL/min | 140 | 9   | 85   | 85   | -    | - | 34 |
| PMA-MIL-101                                               | 0.5 mol HMF,<br>5 mL DMSO                  | O <sub>2</sub><br>20 mL/min | 140 | 20  | 90.8 | 88.2 | -    | - | 35 |
| SBA-15-<br>Biimidazole-<br>Ru                             | 0.5 mol HMF<br>8 mL 4-<br>chlorotoluene    | O <sub>2</sub><br>20 mL/min | 110 | 11  | 96.9 | 88.7 | -    | - | 36 |
| Ru/C                                                      | 1 mmol HMF,<br>10 mL H <sub>2</sub> O      | O <sub>2</sub><br>0.5 MPa   | 120 | 10  | 100  | -    | 88   | - | 37 |
| Au-Pd/ZOC                                                 | 0.5 mmol HMF,<br>10 mL H <sub>2</sub> O    | O <sub>2</sub><br>3 bar     | 80  | 4   | >99  | -    | >99  | - | 38 |

|                                                                                |                                                        |                                                   |     |     |       |      |       |    |    |
|--------------------------------------------------------------------------------|--------------------------------------------------------|---------------------------------------------------|-----|-----|-------|------|-------|----|----|
| Pd/HT-5                                                                        | 0.4 mmol HMF,<br>10 mL H <sub>2</sub> O                | O <sub>2</sub><br>100mL/min                       | 100 | 8   | 100   | –    | 99    | –  | 39 |
| Fe <sub>3</sub> O <sub>4</sub> @C<br>@Pt                                       | 15 mg HMF, 0.2<br>mmol Na <sub>2</sub> CO <sub>3</sub> | O <sub>2</sub><br>100mL/min                       | 90  | 4   | 100   | –    | 100   | –  | 40 |
| Pt/C-O-Mg                                                                      | 0.5 mmol HMF,<br>10 mL H <sub>2</sub> O                | O <sub>2</sub><br>1.0 MPa                         | 110 | 12  | 100   | –    | 97    | –  | 41 |
| FeCo/C                                                                         | 1mol HMF,<br>2 mL toluene                              | O <sub>2</sub><br>1.0 MPa                         | 100 | 6   | 99    | 99   | –     | –  | 42 |
| Co/Mn/Br                                                                       | 13.2 mmol 5-<br>HMF,<br>5 mL HOAc                      | N <sub>2</sub> /O <sub>2</sub> = 1/1<br>(mol/mol) | 160 | 0.5 | 100   | –    | 78.1  | –  | 43 |
| Bi(NO <sub>3</sub> ) <sub>3</sub> ·5H <sub>2</sub><br>O, cellulose-<br>Cu-NP   | 126 mg HMF,<br>10 mL MeCN                              | Air                                               | 80  | 2   | 96.5  | 82   | –     | –  | 44 |
| Ni <sub>3</sub> (BTP) <sub>2</sub>                                             | 1.8 mmol HMF,<br>25 mL H <sub>2</sub> O                | O <sub>2</sub><br>30 bar                          | 120 | 24  | 100   | 99   | –     | –  | 45 |
| SBA-NH <sub>2</sub> -VO <sup>2+</sup><br>SBA-NH <sub>2</sub> -Cu <sup>2+</sup> | 100 mg HMF<br>7 mL 4-<br>chlorotoluene                 | O <sub>2</sub><br>0.28 MPa                        | 110 | 12  | 98.8  | 62.7 | –     | –  | 46 |
| V <sub>2</sub> O <sub>5</sub>                                                  | 2.0 mmol HMF<br>10 mL acetic acid                      | O <sub>2</sub><br>10 bar                          | 100 | 4   | 99    | –    | –     | 75 | 47 |
| N-doped<br>graphene<br>NG-800                                                  | 1mol HMF, 30<br>mL acetonitril                         | O <sub>2</sub><br>1.0 MPa                         | 100 | 6   | 100   | 99.5 | –     | –  | 48 |
| NNC-900                                                                        | 0.63 mmol HMF,<br>10 mL H <sub>2</sub> O               | O <sub>2</sub><br>100mL/min                       | 80  | 48  | 100   | –    | 80    | –  | 49 |
| GO                                                                             | 2 mmol HMF,<br>4 mL DMSO                               | O <sub>2</sub><br>20 mL/min                       | 140 | 24  | 100   | 90   | –     | –  | 50 |
| [EMIM] <sub>4</sub> Mo <sub>8</sub><br>O <sub>26</sub>                         | 9 mmol HMF, 18<br>mmol NaOH<br>20 mL H <sub>2</sub> O  | 25 ml 6 %<br>H <sub>2</sub> O <sub>2</sub>        | 100 | 2   | 96.2  | –    | 92.7  | –  | 51 |
| Ru/CTF                                                                         | 1mmol HMF,<br>15 mL MTBE                               | Air<br>20 bar                                     | 80  | 1   | 86.3  | 63.6 | –     | –  | 52 |
| Ru/CTF                                                                         | 1mmol HMF,<br>15 mL H <sub>2</sub> O                   | Air<br>20 bar                                     | 140 | 3   | 100   | 0.1  | 77.6  | –  | 53 |
| C-Fe <sub>3</sub> O <sub>4</sub> -Pd                                           | 0.4 mmol HMF, 8<br>mL H <sub>2</sub> O                 | O <sub>2</sub><br>30 mL/min                       | 80  | 4   | 98.2  | –    | 91.8  | –  | 54 |
| Pt/TiO <sub>2</sub>                                                            | 2 g HMF,<br>NaHCO <sub>3</sub> /5-<br>HMF=2            | Air<br>0.1 MPa                                    | 100 | 6   | >99.9 | –    | >99.9 | –  | 55 |
| Pt/CNT                                                                         | 0.5 mmol HMF,                                          | O <sub>2</sub>                                    | 90  | 14  | 100   | –    | 98    | –  | 56 |

|                                                                |                                       |                             |     |    |      |      |      |   |    |
|----------------------------------------------------------------|---------------------------------------|-----------------------------|-----|----|------|------|------|---|----|
|                                                                | 20 ml H <sub>2</sub> O                | 0.5 MPa                     |     |    |      |      |      |   |    |
| Polyaniline-VO(acac) <sub>2</sub>                              | 100 mg HMF, 8 mL 4-chlorotoluene      | O <sub>2</sub><br>20 mL/min | 110 | 12 | 99.2 | 86.2 | -    | - | 57 |
| VO <sub>2</sub> -PANI/CNT                                      | 1mol HMF, 2 mL DMSO                   | O <sub>2</sub><br>1.0 MPa   | 120 | 11 | >99  | 96   | -    | - | 58 |
| Fe <sub>3</sub> O <sub>4</sub> -CoO <sub>x</sub>               | 70 mg HMF, 4 mL DMSO                  | t-BuOOH<br>0.5 mL           | 80  | 15 | 97.2 | -    | 68.6 | - | 59 |
| GO                                                             | 1mol HMF, 30 mL acetonitrile          | -                           | 100 | 18 | 100  | 99.6 | -    | - | 60 |
| GO <sub>ase</sub> M <sub>3-5</sub> PaoABC                      | 0.3 mmol 5-HMF, 0.3 mL MeCN           | Air<br>1.0 MPa              | 37  | 10 | 100  | -    | 86.9 | - | 61 |
| Cs <sub>3</sub> HPMo <sub>11</sub> VO <sub>40</sub>            | 1mol 5-HMF, 2 mL DMSO                 | O <sub>2</sub><br>0.8 MPa   | 110 | 6  | 99   | 99   | -    | - | 62 |
| Au-Pd/CNT                                                      | 0.50 mmol HMF, 20 mL H <sub>2</sub> O | O <sub>2</sub><br>0.5 MPa   | 100 | 12 | 99   | -    | 99   | - | 63 |
| Ag-OMS-2                                                       | 315 mg HMF, 40 mL isopropyl alcohol   | Air<br>15 atm               | 165 | 6  | 99   | 99   | -    | - | 64 |
| FeIII-POP-1                                                    | 1.58 mmol HMF, 10 mL H <sub>2</sub> O | Air<br>10 bar               | 100 | 10 | 100  | -    | 79   | - | 65 |
| K-OMS-2                                                        | 100 mg HMF, 3 mL DMSO                 | O <sub>2</sub><br>10 mL/min | 110 | 6  | 99   | 99   | -    | - | 66 |
| Au/HT                                                          | 1 mmol HMF, 6 mL H <sub>2</sub> O     | O <sub>2</sub><br>50 mL/min | 95  | 7  | 99   | -    | 99   | - | 67 |
| Fe <sub>3</sub> O <sub>4</sub> /Mn <sub>3</sub> O <sub>4</sub> | 126 mg HMF, 7 mL DMF                  | O <sub>2</sub><br>20 mL/min | 120 | 4  | 99.8 | 82.1 | -    | - | 68 |
| RuCo(OH) <sub>2</sub> -CeO <sub>2</sub>                        | 126 mg HMF, 7 mL MIBK                 | O <sub>2</sub><br>20 mL/min | 120 | 12 | 96.5 | 82.6 | 8.9  | - | 69 |
| Ru/hydroxyapatite                                              | 100 mg HMF, 7 mL 4-chlorotoluene      | O <sub>2</sub><br>20 mL/min | 90  | 4  | 100  | 89.1 | 9.3  | - | 70 |

**Table S2** Elementary analysis, BET surface area, acid content and base content for HPMoV, Mg<sub>n</sub>Al-LDH and HPMoV@Mg<sub>n</sub>Al-Surf (n = 1-4)

| Catalyst                           | Elementary results (calculated values in parenthesis) <sup>a</sup> /% |       |      |       |       | Loading amount<br>wt % | S <sub>BET</sub><br>(m <sup>2</sup> /g) | Acidity<br>(mmol/g)                       |                                    |                                    | Basicity <sup>d</sup><br>(mmol/g) |
|------------------------------------|-----------------------------------------------------------------------|-------|------|-------|-------|------------------------|-----------------------------------------|-------------------------------------------|------------------------------------|------------------------------------|-----------------------------------|
|                                    | P                                                                     | Mo    | V    | Al    | Mg    |                        |                                         | Total<br>acidity <sup>b</sup><br>(mmol/g) | B-acidity <sup>c</sup><br>(mmol/g) | L-acidity <sup>c</sup><br>(mmol/g) |                                   |
| HPMoV                              | 1.80                                                                  | 55.20 | 5.85 | -     | -     | -                      | 3.90                                    | 2.66                                      | 2.60                               | -                                  | -                                 |
| Mg <sub>1</sub> Al-LDH             | -                                                                     | -     | -    | 18.03 | 16.31 | -                      | 78.5                                    | 0.21                                      | -                                  | 0.20                               | 0.68                              |
| Mg <sub>2</sub> Al-LDH             | -                                                                     | -     | -    | 13.02 | 23.38 | -                      | 75.4                                    | 0.18                                      | -                                  | 0.17                               | 0.74                              |
| Mg <sub>3</sub> Al-LDH             | -                                                                     | -     | -    | 10.09 | 27.45 | -                      | 71.2                                    | 0.16                                      | -                                  | 0.14                               | 0.86                              |
| Mg <sub>4</sub> Al-LDH             | -                                                                     | -     | -    | 8.31  | 30.00 | -                      | 68.6                                    | 0.12                                      | -                                  | 0.11                               | 0.94                              |
| HPMoV@Mg <sub>1</sub> Al-Surf (23) | 0.59                                                                  | 18.04 | 1.93 | 8.82  | 7.95  | 23.0                   | 36.0                                    | 0.73                                      | 0.51                               | 0.16                               | 0.11                              |
| HPMoV@Mg <sub>2</sub> Al-Surf (23) | 0.63                                                                  | 19.98 | 2.13 | 4.92  | 8.83  | 23.0                   | 32.6                                    | 0.70                                      | 0.50                               | 0.14                               | 0.13                              |
| HPMoV@Mg <sub>3</sub> Al-Surf (23) | 0.59                                                                  | 18.70 | 2.01 | 4.63  | 12.35 | 23.0                   | 29.5                                    | 0.67                                      | 0.51                               | 0.11                               | 0.14                              |
| HPMoV@Mg <sub>4</sub> Al-Surf (5)  | 0.19                                                                  | 5.42  | 0.54 | 6.10  | 21.92 | 5.0                    | 45.4                                    | 0.21                                      | 0.08                               | 0.10                               | 0.56                              |
| HPMoV@Mg <sub>4</sub> Al-Surf (12) | 0.38                                                                  | 11.39 | 0.23 | 5.38  | 19.25 | 12.0                   | 38.0                                    | 0.37                                      | 0.22                               | 0.09                               | 0.42                              |
| HPMoV@Mg <sub>4</sub> Al-Surf (17) | 0.49                                                                  | 14.85 | 1.57 | 4.95  | 17.76 | 17.0                   | 33.6                                    | 0.47                                      | 0.34                               | 0.08                               | 0.28                              |
| HPMoV@Mg <sub>4</sub> Al-Surf (23) | 0.57                                                                  | 18.35 | 1.98 | 4.52  | 16.19 | 23.0                   | 23.4                                    | 0.62                                      | 0.51                               | 0.07                               | 0.20                              |
| HPMoV@Mg <sub>4</sub> Al-Surf (28) | 0.71                                                                  | 20.85 | 2.23 | 4.21  | 15.08 | 28.0                   | 13.4                                    | 0.68                                      | 0.57                               | 0.06                               | 0.13                              |

<sup>a</sup>The elementary results were calculated by the ICP-AES.

<sup>b</sup>The total acidity was measured by potentiometric titration.

<sup>c</sup>The B and L acidity were valued by the IR spectra of adsorbed pyridine and calculated by Lambert-Beer equation.

<sup>d</sup>The basicity was measured by conductivity titration method.

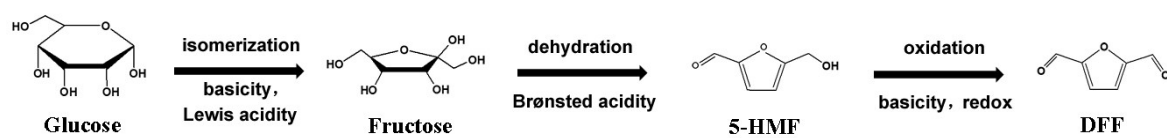

Scheme S1 Reaction pathways for production of 5-HMF then to DFF from glucose in presence of multi-functional catalysts

## Reference

1. G. A. Tsigdinos and C. J. Hallada, *Inorg. Chem.*, 1968, **7**, 437-441.
2. D. G. Cantrell, L. J. Gillie, A. F. Lee and K. Wilson, *Appl. Catal. A: Gen.*, 2005, **287**, 183-190.
3. H. Liu, X. J. Cao, J. N. Wei, W. L. Jia, M. Z. Li, X. Tang, X. H. Zeng, Y. Sun, T. Z. Lei, S. J. Liu and L. Lin, *ACS Sustainable Chem. Eng.*, 2019, **7**, 7812-7822.
4. H. Zhou, H. H. Xu and Y. Liu, *Appl. Catal. B: Environ.*, 2019, **244**, 965-973.
5. Z. L. Yuan, B. Liu, P. Zhou, Z. H. Zhang and Q. Chi, *Catal Sci Technol.*, 2018, **8**, 4430-4439.
6. D. K. Mishra, J. K. Cho, Y. J. Yi, H. J. Lee and Y. J. Kim, *J. Ind. Eng. Chem.*, 2019, **70**, 338-345.
7. C. M. Zhou, W. R. Shi, X. Y. Wan, Y. Meng, Y. Yao, Z. Guo, Y. H. Dai, C. Wang and Y. H. Yang, *Catal. Today*, 2019, **330**, 92-100.
8. L. F. Chen, W. Y. Yang, Z. Y. Gui, S. Saravanamurugan, A. Riisager, W. R. Cao and Z. W. Qi, *Catal. Today*, 2019, **319**, 105-112.
9. H. A. Xia, J. H. An, M. Hong, S. Q. Xu, L. Zhang and S. L. Zuo, *Catal. Today*, 2019, **319**, 113-120.
10. H. J. Yu, K. A. Kim, M. J. Kang, S. Y. Wang and H. G. Cha, *ACS Sustain. Chem. Eng.*, 2018, **7**, 3742-3748.
11. Q. Q. Li, H. Y. Wang, Z. P. Tian, Y. J. Weng, C. G. Wang, J. R. Ma, C. F. Zhu, W. Z. Li, Q. Y. Liu and L. L. Ma, *Catal. Sci. Technol.*, 2019, **9**, 1570-1580.
12. P. V. Rathod and V. H. Jadhav, *ACS Sustain. Chem. Eng.*, 2018, **6**, 5766-5771.
13. M. Ventura, F. Lobefaro, E. De Giglio, M. Distaso, F. Nocito and A. Dibenedetto, *ChemSusChem*, 2018, **11**, 1305-1315.
14. C. T. Chen, C. V. Nguyen, Z. Y. Wang, Y. Bando, Y. Yamauchi, M. T. S. Bazziz, A. Fatehmulla, W. A. Farooq, T. Yoshikawa, T. Masuda and K. C. W. Wu, *ChemCatChem*, 2018, **10**, 361-365.
15. B. Ma, Y. Y. Wang, X. N. Guo, X. L. Tong, C. Liu, Y. W. Wang and X. Y. Guo, *Appl. Catal. A: Gen.*, 2018, **552**, 70-76.
16. J. S. Shen, H. Chen, K. Q. Chen, Y. Qin, X. Y. Lu, P. K. Ouyang and J. Fu, *Ind. Eng. Chem. Res.*, 2018, **57**, 2811-2818.
17. W. J. Liu, L. N. Dang, Z. R. Xu, H. Q. Yu, S. Jin and G. W. Huber, *ACS Catal.*, 2018, **8**, 5533-5541.
18. Y. S. Ren, Z. L. Yuan, K. L. Lv, J. Sun, Z. H. Zhang and Q. Chi, *Green Chem.*, 2018, **20**, 4946-4956.
19. C. M. Pichler, M. G. Al-Shaal, D. Gu, H. Joshi, W. Ciptonugroho and F. Schuth, *ChemSusChem*, 2018, **11**, 2083-2090.

20. D. K. Mishra, J. K. Cho and Y. J. Kim, *J. Ind. Eng. Chem.*, 2018, **60**, 513-519.
21. A. Tirsoaga, M. El Fergani, V. I. Parvulescu and S. M. Coman, *ACS Sustain. Chem. Eng.*, 2018, **6**, 14292-14301.
22. S. Zhang, X. Sun, Z. Zheng and L. Zhang, *Catal. Commun.*, 2018, **113**, 19-22.
23. A. B. Gawade, A. V. Nakhate and G. D. Yadav, *Catal. Today*, 2018, **309**, 119-125.
24. G. Q. Lv, S. W. Chen, H. F. Zhu, M. Li and Y. X. Yang, *App. Surf. Sci.*, 2018, **458**, 24-31.
25. F. Nocito, M. Ventura, M. Aresta and A. Dibenedetto, *ACS Omega*, 2018, **3**, 18724-18729.
26. S. Xu, P. Zhou, Z. H. Zhang, C. J. Yang, B. G. Zhang, K. J. Deng, S. Bottle and H. Y. Zhu, *J. Am. Chem. Soc.*, 2017, **139**, 14775-14782.
27. Z. Z. Yang, W. Qi, R. X. Su and Z. M. He, *Energ. Fuel.*, 2016, **31**, 533-541.
28. D. K. Mishra, H. J. Lee, J. Kim, H. S. Lee, J. K. Cho, Y. W. Suh, Y. Yi and Y. J. Kim, *Green Chem.*, 2017, **19**, 1619-1623.
29. K. Gupta, R. K. Rai, A. D. Dwivedi and S. K. Singh, *ChemCatChem*, 2017, **9**, 2760-2767.
30. X. B. Zuo, A. S. Chaudhari, K. Snavely, F. H. Niu, H. Zhu and K. J. Martin, *AIChE J.*, 2017, **63**, 162-171.
31. W. Hou, Q. Wang, Z. J. Guo, J. Li, Y. Zhou and J. Wang, *Catal. Sci. Technol.*, 2017, **7**, 1006-1016.
32. M. Cui, R. L. Huang, W. Qi, R. X. Su and Z. M. He, *RSC Adv.*, 2017, **7**, 7560-7566.
33. E. Hayashi, T. Komanoya, K. Kamata and M. Hara, *ChemSusChem*, 2017, **10**, 654-658.
34. P. V. Rathod, S. D. Nale and V. H. Jadhav, *ACS Sustain. Chem. Eng.*, 2016, **5**, 701-707.
35. J. Zhao, J. Anjali, Y. B. Yan and J. M. Lee, *ChemCatChem*, 2017, **9**, 1187-1191.
36. F. Wang, L. Jiang, J. M. Wang and Z. H. Zhang, *Energ. Fuel.*, 2016, **30**, 5885-5892.
37. G. S. Yi, S. P. Teong and Y. G. Zhang, *Green Chem.*, 2016, **18**, 979-983.
38. Z. Y. Gui and W. Cao, *ChemCatChem*, 2016, **8**, 3636-3643.
39. Y. B. Wang, K. Yu, D. Lei, W. Si, Y. J. Feng, L. L. Lou and S. X. Liu, *ACS Sustain. Chem. Eng.*, 2016, **4**, 4752-4761.
40. Y. W. Zhang, Z. M. Xue, J. F. Wang, X. H. Zhao, Y. H. Deng, W. C. Zhao and T. C. Mu, *RSC Adv.*, 2016, **6**, 51229-51237.
41. X. W. Han, L. Geng, Y. Guo, R. Jia, X. H. Liu, Y. G. Zhang and Y. Q. Wang, *Green Chem.*, 2016, **18**, 1597-1604.
42. R. Q. Fang, R. Luque and Y. W. Li, *Green Chem.*, 2016, **18**, 3152-3157.

43. X. B. Zuo, P. Venkitasubramanian, D. H. Busch and B. Subramaniam, *ACS Sustain. Chem. Eng.*, 2016, **4**, 3659-3668.
44. D. Baruah, F. L. Hussain, M. Suri, U. P. Saikia, P. Sengupta, D. K. Dutta and D. Konwar, *Catal. Commun.*, 2016, **77**, 9-12.
45. C. Lucarelli, S. Galli, A. Maspero, A. Cimino, C. Bandinelli, A. Lolli, J. Velasquez Ochoa, A. Vaccari, F. Cavani and S. Albonetti, *J. Phys. Chem. C*, 2016, **120**, 15310-15321.
46. L. F. Liao, Y. Liu, Z. Y. Li, J. P. Zhuang, Y. B. Zhou and S. Chen, *RSC Adv.*, 2016, **6**, 94976-94988.
47. X. K. Li and Y. G. Zhang, *Green Chem.*, 2016, **18**, 643-647.
48. G. Q. Lv, H. L. Wang, Y. X. Yang, X. Li, T. S. Deng, C. M. Chen, Y. L. Zhu and X. L. Hou, *Catal. Sci. Technol.*, 2016, **6**, 2377-2386.
49. C. V. Nguyen, Y. T. Liao, T. C. Kang, J. E. Chen, T. Yoshikawa, Y. Nakasaka, T. Masuda and K. C. W. Wu, *Green Chem.*, 2016, **18**, 5957-5961.
50. G. Q. Lv, H. L. Wang, Y. X. Yang, T. S. Deng, C. M. Chen, Y. L. Zhu and X. Hou, *Green Chem.*, 2016, **18**, 2302-2307.
51. S. Li, K. M. Su, Z. H. Li and B. W. Cheng, *Green Chem.*, 2016, **18**, 2122-2128.
52. J. Artz, S. Mallmann and R. Palkovits, *ChemSusChem*, 2015, **8**, 672-679.
53. J. Artz and R. Palkovits, *ChemSusChem*, 2015, **8**, 3832-3838.
54. N. Mei, B. Liu, J. D. Zheng, K. L. Lv, D. G. Tang and Z. H. Zhang, *Catal. Sci. Technol.*, 2015, **5**, 3194-3202.
55. H. Ait Rass, N. Essayem and M. Besson, *ChemSusChem*, 2015, **8**, 1206-1217.
56. C. M. Zhou, W. P. Deng, X. Y. Wan, Q. H. Zhang, Y. H. Yang and Y. Wang, *ChemCatChem*, 2015, **7**, 2853-2863.
57. F. H. Xu and Z. H. Zhang, *ChemCatChem*, 2015, **7**, 1470-1477.
58. Y. Y. Guo and J. Z. Chen, *ChemPlusChem*, 2015, **80**, 1760-1768.
59. S. G. Wang, Z. H. Zhang and B. Liu, *ACS Sustain. Chem. Engin.*, 2015, **3**, 406-412.
60. G. Q. Lv, H. L. Wang, Y. X. Yang, T. S. Deng, C. M. Chen, Y. L. Zhu and X. L. Hou, *ACS Catal.*, 2015, **5**, 5636-5646.
61. S. M. McKenna, S. Leimkühler, S. Herter, N. J. Turner and A. J. Carnell, *Green Chem.*, 2015, **17**, 3271-3275.
62. R. L. Liu, J. Z. Chen, L. M. Chen, Y. Y. Guo and J. W. Zhong, *ChemPlusChem*, 2014, **79**, 1448-1454.



63. X. Wan, C. Zhou, J. Chen, W. Deng, Q. Zhang, Y. Yang and Y. Wang, *ACS Catal.*, 2014, **4**, 2175-2185.
64. G. D. Yadav and R. V. Sharma, *Appl. Catal., B: Environ.*, 2014, **147**, 293-301.
65. B. Saha, D. Gupta, M. M. Abu-Omar, A. Modak and A. Bhaumik, *J. Catal.*, 2013, **299**, 316-320.
66. Z. Z. Yang, J. Deng, T. Pan, Q. X. Guo and Y. Fu, *Green Chem.*, 2012, **14**, 2986-2989.
67. N. K. Gupta, S. Nishimura, A. Takagaki and K. Ebitani, *Green Chem.*, 2011, **13**, 824-827.
68. B. Liu, Z. H. Zhang, K. L. Lv, K. J. Deng and H. M. Duan, *Appl Catal A*, 2014, **472**, 64-71.
69. Y. M. Wang, B. Liu, K. C. Huang and Z. H. Zhang, *Ind Eng Chem Res.*, 2014, **53**, 1313-1319.
70. Z. H. Zhang, Z. L. Yuan, D. G. Tang, Y. S. Ren, K. L. Lv and B. Liu, *ChemSusChem*, 2014, **7**, 3496-3504.
